# Supplementary material for: Cervical cancer screening knowledge and barriers among women in Addis Ababa, Ethiopia
Source: PubMed Central journal article supplement (PMC6510425; doi:10.1371/journal.pone.0216522), 2019-05-10
Supplement: pone.0216522.s001.pdf [file pone.0216522.s001.pdf]

# Questionnaire

## Part 1 Socio demographic status

| No                                                   | Questions                                | Answers                                                                                                                                                                                | Skip                                                    |
|------------------------------------------------------|------------------------------------------|----------------------------------------------------------------------------------------------------------------------------------------------------------------------------------------|---------------------------------------------------------|
| 101                                                  | Age in years                             | _____                                                                                                                                                                                  |                                                         |
| 102                                                  | Religion                                 | Orthodox.....1<br>Muslim.....2<br>Protestant.....3<br>Catholic.....4<br>Other.....5                                                                                                    |                                                         |
| 103                                                  | Marital status                           | single... .....1<br>Married.....2<br>Divorce.....3<br>Widowed.....4<br>separated.....5                                                                                                 |                                                         |
| 104                                                  | Educational status                       | illiterate.....1<br>primary.....2<br>secondary.....3<br>college.....4<br>other.....5                                                                                                   |                                                         |
| 105                                                  | Occupation                               | House wife.....1<br>Private employee.....2<br>Farmer.....3<br>Government employee..... 4<br>5.Daily laborer.....5<br>6.Merchant..... 6<br>7.Student.....7<br>8.Others(specify) ..... 8 |                                                         |
| 106                                                  | Monthly Income in Birr                   |                                                                                                                                                                                        |                                                         |
| 107                                                  | Do you know anyone with cervical cancer  | Yes.....1<br>No.....2                                                                                                                                                                  |                                                         |
| <b>Part 2 Risk exposure among the study subjects</b> |                                          |                                                                                                                                                                                        |                                                         |
| 108                                                  | How many children do you have            | _____ In numbers                                                                                                                                                                       |                                                         |
| 109                                                  | Age at first sexual intercourse in years | _____ In years                                                                                                                                                                         |                                                         |
| 110                                                  | Did you use any contraceptive methods    | yes.....1<br>No.....2 → To114                                                                                                                                                          |                                                         |
| 111                                                  | If yes what type?                        | Oral contraceptive pills.....1<br>Injectables.....2<br>Norplant .....3<br>Barrier methods.....4<br>Other specify .....5                                                                | If the answer is other than 1 no go to question no `114 |

|     |                                                                                          |                       |  |
|-----|------------------------------------------------------------------------------------------|-----------------------|--|
| 112 | If the response to the above question is 1, for how long did you use oral contraception? | .....Years            |  |
| 113 | Are you currently using oral contraception?                                              | Yes.....1<br>No.....2 |  |
| 114 | Do you smoke?                                                                            | Yes.....1<br>No.....2 |  |

Part 3 Knowledge about cervical cancer and screening part

| No  | Questions                                                                                      | Response                                                                                                                                                                                                                                                                           | Skip                  |
|-----|------------------------------------------------------------------------------------------------|------------------------------------------------------------------------------------------------------------------------------------------------------------------------------------------------------------------------------------------------------------------------------------|-----------------------|
| 201 | Have you ever heard about cancer                                                               | Yes.....1<br>No.....2 →                                                                                                                                                                                                                                                            | End the question here |
| 202 | Have you ever heard about cervical cancer                                                      | Yes.....1<br>No.....2 →                                                                                                                                                                                                                                                            | End the question here |
| 203 | Where did you first learn about carcinoma of the cervix<br><br><i>Multiple answer possible</i> | News Media.....1<br>Brochures, posters and other printed materials.....2<br>Health workers.....3<br>Family, friends, neighbors and colleagues.....4<br>Religious leaders.....5<br>Teachers.....6<br>Other (please explain).....7                                                   |                       |
| 204 | What are the symptoms of carcinoma of the cervix?<br><br><i>Multiple answer possible</i>       | Vaginal bleeding.....1<br>foul smelling of Vaginal discharges.....2<br>Do not know.....3<br>Other.....4                                                                                                                                                                            |                       |
| 205 | What are the risk factors for cancer of the cervix?<br><br><i>Multiple answer possible</i>     | Acquiring HPV virus.....1<br>Having multiple sexual partners.....2<br>Early sexual intercourse.....3<br>Avoid having to many children.....4<br>Avoid using oral contraceptives for long time.....5<br>Cigarette smoking.....6<br>Do not know.....7<br>Other (please explain).....8 |                       |
| 206 | How can a person prevent                                                                       | through vaccination of HPV                                                                                                                                                                                                                                                         |                       |

|     |                                                                                              |                                                                                                                                                                                                                                                                                                               |           |
|-----|----------------------------------------------------------------------------------------------|---------------------------------------------------------------------------------------------------------------------------------------------------------------------------------------------------------------------------------------------------------------------------------------------------------------|-----------|
|     | getting cancer of the cervix?<br><br><i>Multiple answer possible</i>                         | vaccine.....1<br>Avoid multiple sexual partners.....2<br>Avoid early sexual intercourse.....3<br>Avoid having to many children.....4<br>Avoid using oral contraceptives for long time.....5<br>Quit smoking.....6<br>Screening for cervical cancer.....7<br>Other (please explain).....8<br>Do not know.....9 |           |
| 207 | Can cancer of the cervix be cured in its earliest stages?                                    | Yes.....1<br>No .....2<br>Don't know .....3                                                                                                                                                                                                                                                                   |           |
| 208 | How can someone with cancer of the cervix be treated?<br><br><i>Multiple answer possible</i> | Herbal remedies.....1<br>surgery.....2<br>Specific drugs given by hospital.....3<br>radiotherapy.....4<br>Do not know.....5                                                                                                                                                                                   |           |
| 209 | How expensive do you think cancer of the cervix treatment is in this country?                | It is free of charge.....1<br>It is reasonably priced.....2<br>It is somewhat/moderately expensive.....3<br>It is very expensive.....4<br>Don't know.....5<br>other(specify) ..... 6                                                                                                                          |           |
| 210 | Are there screening procedures to detect premalignant cervical lesion?                       | Yes.....1<br>No.....2                                                                                                                                                                                                                                                                                         | if no 301 |
| 211 | How frequent is screening for premalignant cervical lesion done?                             | Once every year.....1<br>Once every three years.....2<br>Once every 5 years.....3<br>Any other(mention).....4<br>Don't know.....5                                                                                                                                                                             |           |
| 212 | Who should be screened?                                                                      | Women of 25years and above.....1                                                                                                                                                                                                                                                                              |           |

|     |                                                                                                                                   |                                                                               |  |
|-----|-----------------------------------------------------------------------------------------------------------------------------------|-------------------------------------------------------------------------------|--|
|     |                                                                                                                                   | Prostitutes.....2<br>Elderly women.....3<br>Other.....4<br>Don't know.....5   |  |
| 213 | Do you know procedures used in screening for premalignant cervical lesions                                                        | Yes.....1<br>No.....2                                                         |  |
| 214 | Can you mention any of the procedures used in screening for premalignant cervical lesions?<br><br><i>Multiple answer possible</i> | VIA.....1<br>VILI.....2<br>Pap Smear.....3<br>other.....4<br>don't know.....5 |  |

Part 4. Practice Questions

| No  | Questions                                                                        | Response                                                                                     | Skip                                           |
|-----|----------------------------------------------------------------------------------|----------------------------------------------------------------------------------------------|------------------------------------------------|
| 401 | Have you ever heard of screening                                                 | yes.....1<br>No.....2                                                                        |                                                |
| 402 | Have you ever screened for any reproductive health screenings like HIV, STIs.... | yes.....1<br>No.....2                                                                        | If your answer is NO go to question number 407 |
| 403 | Have you ever screened for cancer of the cervix                                  | Yes.....1<br>No.....2                                                                        | If your answer is NO go to question number 407 |
| 404 | Where did you screen                                                             | Hospital(Mention).....1<br><br>private(Mention).....2<br><br>Health centers. (Mention).....3 |                                                |
| 405 | What was the indication                                                          | Self-initiated.....1<br>offered by the health professionals.....2<br>other(specify) .....3   |                                                |
| 406 | If yes how many times in since you become sexually active                        | Once.....1<br>More than once.....2                                                           |                                                |

|     |                                     |                                                                                                                                                                                                                                                                                                 |  |
|-----|-------------------------------------|-------------------------------------------------------------------------------------------------------------------------------------------------------------------------------------------------------------------------------------------------------------------------------------------------|--|
| 407 | When was the last time you screened | within the past three years<br>.....1<br>More than three years ago.<br>.....2                                                                                                                                                                                                                   |  |
| 408 | If no, why?                         | It may be painful. ....1<br>I feel shy.....2<br>I am healthy.....3<br>My husband would not agree.....4<br>I am afraid a screening test<br>would reveal cervical<br>cancer.....5<br>it is expensive.....6<br>I am not<br>informed/knowledge.....7<br>I haven't just decided.....8<br>other.....9 |  |
