# Supplementary material for: Cervical cancer screening knowledge and barriers among women in Addis Ababa, Ethiopia
Source: PubMed Central journal article supplement (PMC6510425; doi:10.1371/journal.pone.0216522), 2019-05-10
Supplement: pone.0216522.s003.pdf [file pone.0216522.s003.pdf]

**Characteristics of women involved in focus group discussion, Addis Ababa, 2015**

| <b>Characteristics</b>                     | <b>Frequency</b> | <b>Percentage</b> |
|--------------------------------------------|------------------|-------------------|
| <b>n</b>                                   | <b>37</b>        | <b>100</b>        |
| <b>Marital status</b>                      |                  |                   |
| Married                                    | 30               | 81                |
| Single                                     | 7                | 18.9              |
| <b>Occupation</b>                          |                  |                   |
| Housewife                                  | 26               | 70.2              |
| Employee                                   | 7                | 18.9              |
| Students                                   | 4                | 11.8              |
| <b>Educational status</b>                  |                  |                   |
| Primary school                             | 20               | 54                |
| Secondary school                           | 12               | 32.4              |
| <b>Above secondary school</b>              | 5                | 13.5              |
| <b>Reproductive health service seeking</b> |                  |                   |
| ANC                                        | 14               | 37.8              |
| PNC                                        | 7                | 18.9              |
| Family planning                            | 16               | 43                |
